# Supplementary material for: Identification of Key Biomarkers in Bladder Cancer: Evidence from a Bioinformatics Analysis
Source: MDPI journal article supplement (doi:10.3390/diagnostics10020066), 2020-01-24
Supplement: s1 [file s1]

**Table S4. KEGG analysis.** Analysis of total DEGs and the subgroups of up- and down-regulated DEGs. Numbers in brackets indicate count of DEGs.

| Analysis of Down-regulated DEGs |                                    |    |     |          |          |                                                                                             |
|---------------------------------|------------------------------------|----|-----|----------|----------|---------------------------------------------------------------------------------------------|
| hsa05200                        | Pathways in cancer                 | 13 | 4.5 | 3.90E-02 | 2.80E-01 | IL6, PTGER3, PTGS2, ROCK2, FGF9, RUNX1T1, FGF10, ZBTB16, FZD7, LAMA2, FOS, PTCH1, FGF2 (13) |
| hsa04022                        | cGMP-PKG signaling pathway         | 12 | 4.2 | 8.20E-05 | 8.10E-03 | KCNMA1, ATP2B4, ROCK2, PLN, MRV11, PDE5A, CREB5, ATP1A2, MYLK, ITPR1, KCNMB1, MYL9 (12)     |
| hsa04024                        | cAMP signaling pathway             | 11 | 3.8 | 2.20E-03 | 8.20E-02 | FOS, PTGER3, ATP2B4, ROCK2, CAMK2G, PLN, ABCC4, CREB5, PTCH1, ATP1A2, MYL9 (11)             |
| hsa04270                        | Vascular smooth muscle contraction | 10 | 3.5 | 1.80E-04 | 8.70E-03 | KCNMA1, ACTG2, ROCK2, CALD1, MRV11, PLA2G2A, MYLK, ITPR1, KCNMB1, MYL9 (10)                 |
| hsa04020                        | Calcium signaling pathway          | 10 | 3.5 | 3.70E-03 | 9.90E-02 | PTGER3, ATP2B4, CHRM3, PDE1C, CAMK2G, PLN, PLCD4, PTGER, MYLK, ITPR1 (10)                   |
| hsa05205                        | Proteoglycans in cancer            | 10 | 3.5 | 7.60E-03 | 1.50E-01 | GPC3, ROCK2, CAMK2G, HBEGF, PTCH1, FLNC, FGF2, FZD7, FLNA, ITPR1 (10)                       |
| hsa04510                        | Focal adhesion                     | 10 | 3.5 | 9.20E-03 | 1.70E-01 | LAMA2, ROCK2, ITGA8, ILK, ACTN1, FLNC, FLNA, MYLK, MYL9, VCL (10)                           |
| hsa04810                        | Regulation of actin cytoskeleton   | 10 | 3.5 | 1.00E-02 | 1.60E-01 | CHRM3, ROCK2, FGF9, ITGA8, ACTN1, FGF10, FGF2, MYLK, MYL9, VCL (10)                         |
| hsa04010                        | MAPK signaling pathway             | 10 | 3.5 | 3.10E-02 | 2.60E-01 | FOS, NTF3, FGF9, MAPT, CACNB2, FGF10, GADD45B, FLNC, FGF2, FLNA (10)                        |
| hsa05410                        | Hypertrophic cardiomyopathy (HCM)  | 9  | 3.1 | 5.40E-05 | 1.10E-02 | IL6, ACTC1, DES, DMD, ITGA8, CACNB2, TPM2, TPM1, SGCA (9)                                   |
