# Supplementary material for: Identification of Key Biomarkers in Bladder Cancer: Evidence from a Bioinformatics Analysis
Source: MDPI journal article supplement (doi:10.3390/diagnostics10020066), 2020-01-24
Supplement: s1 [file s1]

**Table S5. GO and KEGG pathway enrichment analysis of 14 hub genes in BC samples.**

Numbers in brackets indicate count of hub genes.

| ID                  | Description                                | Count in Gene set | Percentage% | P-value  | List of Genes                                                                           |
|---------------------|--------------------------------------------|-------------------|-------------|----------|-----------------------------------------------------------------------------------------|
| <b>GOTERM_BP</b>    |                                            |                   |             |          |                                                                                         |
| GO:1902589          | Single-organism organelle organization     | 12                | 85.7        | 4.40E-10 | CCNB1, CDK1, KIF2C, KIF11, MAD2L1, CRYAB, AURKA, CDC20, UBE2C, TPM1, CASQ2, KIF20A (12) |
| GO:0051301          | Cell division                              | 10                | 71.4        | 4.20E-11 | CCNB1, CDK1, KIF2C, KIF11, MAD2L1, AURKA, CDC20, UBE2C, CCNA2, KIF20A (10)              |
| GO:1903047          | Mitotic cell cycle process                 | 10                | 71.4        | 2.00E-09 | CCNB1, CDK1, KIF2C, KIF11, MAD2L1, AURKA, CDC20, UBE2C, CCNA2, KIF20A (10)              |
| GO:0000278          | Mitotic cell cycle                         | 10                | 71.4        | 4.20E-09 | CCNB1, CDK1, KIF2C, KIF11, MAD2L1, AURKA, CDC20, UBE2C, CCNA2, KIF20A (10)              |
| GO:0022402          | Cell cycle process                         | 10                | 71.4        | 8.20E-08 | CCNB1, CDK1, KIF2C, KIF11, MAD2L1, AURKA, CDC20, UBE2C, CCNA2, KIF20A (10)              |
| GO:0007049          | Cell cycle                                 | 10                | 71.4        | 5.00E-07 | CCNB1, CDK1, KIF2C, KIF11, MAD2L1, AURKA, CDC20, UBE2C, CCNA2, KIF20A (10)              |
| GO:0065009          | Regulation of molecular function           | 10                | 71.4        | 4.80E-05 | CCNB1, CDK1, MAD2L1, CRYAB, AURKA, CDC20, UBE2C, CCNA2, TPM1, CASQ2 (10)                |
| GO:0007067          | Mitotic nuclear division                   | 9                 | 64.3        | 2.20E-10 | CCNB1, CDK1, KIF2C, KIF11, MAD2L1, AURKA, CDC20, UBE2C, CCNA (9)                        |
| GO:0000280          | Nuclear division                           | 9                 | 64.3        | 2.40E-09 | CCNB1, CDK1, KIF2C, KIF11, MAD2L1, AURKA, CDC20, UBE2C, CCNA2 (9)                       |
| GO:0048285          | Organelle fission                          | 9                 | 64.3        | 4.00E-09 | CCNB1, CDK1, KIF2C, KIF11, MAD2L1, AURKA, CDC20, UBE2C, CCNA2 (9)                       |
|                     |                                            |                   |             |          |                                                                                         |
| <b>GOTERM_CC</b>    |                                            |                   |             |          |                                                                                         |
| GO:0005829          | Cytosol                                    | 11                | 78.6        | 6.80E-05 | CCNB1, CDK1, KIF2C, KIF11, MAD2L1, CRYAB, AURKA, CDC20, UBE2C, KPNA2, TPM1 (11)         |
| GO:0015630          | Microtubule cytoskeleton                   | 9                 | 64.3        | 9.60E-07 | CCNB1, CDK1, KIF2C, KIF11, MAD2L1, CRYAB, AURKA, CDC20, KIF20A (9)                      |
| GO:000565           | Nucleoplasm                                | 9                 | 64.3        | 1.50E-03 | CCNB1, CDK1, CRYAB, AURKA, CDC20, UBE2C, KPNA2, CCNA2, KIF20A (9)                       |
| GO:0005819          | Spindle                                    | 7                 | 50          | 1.20E-07 | CCNB1, CDK1, KIF11, MAD2L1, AURKA, CDC20, KIF20A (7)                                    |
| GO:0099513          | Polymeric cytoskeletal fiber               | 6                 | 42.9        | 2.40E-04 | CDK1, KIF2C, KIF11, AURKA, TPM1, KIF20A (6)                                             |
| GO:0099512          | Supramolecular fiber                       | 6                 | 42.9        | 2.40E-04 | CDK1, KIF2C, KIF11, AURKA, TPM1, KIF20A (6)                                             |
| GO:0000922          | Spindle pole                               | 5                 | 35.7        | 4.50E-06 | CCNB1, KIF11, MAD2L1, AURKA, CDC20 (5)                                                  |
| GO:0098687          | Chromosomal region                         | 5                 | 35.7        | 1.90E-04 | CCNB1, CDK1, KIF2C, MAD2L1, AURKA (5)                                                   |
| GO:0005874          | Microtubule                                | 5                 | 35.7        | 3.50E-04 | CDK1, KIF2C, KIF11, AURKA, KIF20A (5)                                                   |
| GO:0044427          | Chromosomal part                           | 5                 | 35.7        | 4.90E-03 | CCNB1, CDK1, KIF2C, MAD2L1, AURKA (5)                                                   |
|                     |                                            |                   |             |          |                                                                                         |
| <b>GOTERM_MF</b>    |                                            |                   |             |          |                                                                                         |
| GO:0019899          | Enzyme binding                             | 8                 | 57.1        | 2.50E-04 | CCNB1, KIF11, AURKA, CDC20, UBE2C, KPNA2, CCNA2, KIF20A (8)                             |
| GO:0005524          | ATP binding                                | 6                 | 42.9        | 5.50E-03 | CDK1, KIF2C, KIF11, AURKA, UBE2C, KIF20A (6)                                            |
| GO:0032559          | Adenyl ribonucleotide binding              | 6                 | 42.9        | 6.30E-03 | CDK1, KIF2C, KIF11, AURKA, UBE2C, KIF20A (6)                                            |
| GO:0030554          | Adenyl nucleotide binding                  | 6                 | 42.9        | 1.30E-02 | CDK1, KIF2C, KIF11, AURKA, UBE2C, KIF20A (6)                                            |
| GO:0035639          | Purine ribonucleoside triphosphate binding | 6                 | 42.9        | 1.40E-02 | CDK1, KIF2C, KIF11, AURKA, UBE2C, KIF20A (6)                                            |
| GO:0032550          | Purine ribonucleoside binding              | 6                 | 42.9        | 1.40E-02 | CDK1, KIF2C, KIF11, AURKA, UBE2C, KIF20A (6)                                            |
| GO:0001883          | Purine nucleoside binding                  | 6                 | 42.9        | 1.40E-02 | CDK1, KIF2C, KIF11, AURKA, UBE2C, KIF20A (6)                                            |
| GO:0032549          | Ribonucleoside binding                     | 6                 | 42.9        | 1.40E-02 | CDK1, KIF2C, KIF11, AURKA, UBE2C, KIF20A (6)                                            |
| GO:0001882          | Nucleoside binding                         | 6                 | 42.9        | 1.50E-02 | CDK1, KIF2C, KIF11, AURKA, UBE2C, KIF20A (6)                                            |
| GO:0032555          | Purine ribonucleotide binding              | 6                 | 42.9        | 1.50E-02 | CDK1, KIF2C, KIF11, AURKA, UBE2C, KIF20A (6)                                            |
| <b>KEGG_PATHWAY</b> |                                            |                   |             |          |                                                                                         |
| hsa04114            | Oocyte meiosis                             | 5                 | 35.7        | 7.60E-06 | CCNB1, CDK1, MAD2L1, AURKA, CDC20 (5)                                                   |
| hsa04110            | Cell cycle                                 | 5                 | 35.7        | 1.2E-05  | CCNB1, CDK1, MAD2L1, CDC20, CCNA2 (5)                                                   |
| hsa04914            | Progesterone-mediated oocyte maturation    | 4                 | 28.6        | 1.6E-04  | CCNB1, CDK1, MAD2L1, CCNA2 (4)                                                          |
| hsa05203            | Viral carcinogenesis                       | 3                 | 21.4        | 2.8E-02  | CDK1, CDC20, CCNA2 (3)                                                                  |
| hsa04115            | P53 signaling pathway                      | 2                 | 14.3        | 8.4E-02  | CCNB1, CDK1 (2)                                                                         |
