# Supplementary material for: Identification of Key Biomarkers in Bladder Cancer: Evidence from a Bioinformatics Analysis
Source: MDPI journal article supplement (doi:10.3390/diagnostics10020066), 2020-01-24
Supplement: s1 [file s1]

**Table S2. GOTERM CC analysis.** Analysis of total DEGs and the subgroups of up- and down-regulated DEGs. Numbers in brackets indicate count of DEGs.

| ID                            | Description                  | Count in Gene set | Percent -age% | P-value  | Benjamini | List of Genes                                                                                                                                                                                                                                                                                                                                                                                 |                                                      |                                   |                                              |                                                             |                                    |                                   |                   |                                             |                                               |                                             |                                        |                                             |                                       |                                |
|-------------------------------|------------------------------|-------------------|---------------|----------|-----------|-----------------------------------------------------------------------------------------------------------------------------------------------------------------------------------------------------------------------------------------------------------------------------------------------------------------------------------------------------------------------------------------------|------------------------------------------------------|-----------------------------------|----------------------------------------------|-------------------------------------------------------------|------------------------------------|-----------------------------------|-------------------|---------------------------------------------|-----------------------------------------------|---------------------------------------------|----------------------------------------|---------------------------------------------|---------------------------------------|--------------------------------|
|                               |                              |                   |               |          |           | Up-regulated                                                                                                                                                                                                                                                                                                                                                                                  |                                                      |                                   |                                              |                                                             |                                    | Down-regulated                    |                   |                                             |                                               |                                             |                                        |                                             |                                       |                                |
| Analysis of Total DGEs        |                              |                   |               |          |           |                                                                                                                                                                                                                                                                                                                                                                                               |                                                      |                                   |                                              |                                                             |                                    |                                   |                   |                                             |                                               |                                             |                                        |                                             |                                       |                                |
| GO:0043292                    | Contractile fiber            | 34                | 8.1           | 1.60E-16 | 6.50E-14  | TPM3                                                                                                                                                                                                                                                                                                                                                                                          | SCO2 (2)                                             |                                   |                                              |                                                             |                                    |                                   |                   | ARHGEF25<br>VCL<br>MYOM1<br>NEXN<br>SYNM    | CALD1<br>ATP2B4<br>ACTC1<br>FLNA<br>DST CASQ2 | FERMT2<br>DES<br>CRYAB<br>ABCC9<br>SYNE1    | PDLIM3<br>SORBS2<br>PGM5<br>TMOD (32)  | TPM2<br>DMD<br>SYNPO2<br>SVIL               | TPM1<br>ILK<br>FLNC<br>MYH11          | MYL9<br>LMOD1<br>PALLD<br>SVIL |
| GO:0030016                    | Myofibril                    | 33                | 7.9           | 2.30E-16 | 6.50E-14  | TPM3                                                                                                                                                                                                                                                                                                                                                                                          | SCO2 (2)                                             |                                   |                                              |                                                             |                                    |                                   |                   | ARHGEF25<br>VCL<br>MYOM1<br>NEXN<br>SYNMDST | CALD1<br>DES<br>ACTC1<br>FLNA<br>CASQ2        | FERMT2<br>ATP2B4<br>CRYAB<br>ABCC9<br>SYNE1 | PDLIM3<br>SORBS2<br>ACTN1<br>SYNE1     | TPM2<br>DMD<br>SYNPO2<br>PGM5               | TPM1<br>ILK<br>FLNC<br>SVIL           | MYL9<br>LMOD1<br>PALLD<br>SVIL |
| GO:0044449                    | Contractile fiber part       | 32                | 7.7           | 7.70E-16 | 1.50E-13  | TPM3 (1)                                                                                                                                                                                                                                                                                                                                                                                      |                                                      |                                   |                                              |                                                             |                                    |                                   |                   | ARHGEF25<br>DES<br>MYOM1<br>NEXN<br>MYH11   | FERMT2<br>ATP2B4<br>ACTC1<br>FLNA<br>SYNM     | PDLIM3<br>SORBS2<br>CRYAB<br>ABCC9<br>CASQ2 | TPM2<br>DMD<br>ACTN1<br>SYNE1<br>CASQ2 | TPM1<br>ILK<br>SYNPO2<br>PGM5<br>TMOD1 (31) | MYL9<br>VCL<br>LMOD1<br>PALLD<br>SVIL |                                |
| GO:0030017                    | Sarcomere                    | 28                | 6.7           | 2.20E-13 | 3.10E-11  | TPM3 (1)                                                                                                                                                                                                                                                                                                                                                                                      |                                                      |                                   |                                              |                                                             |                                    |                                   |                   | ARHGEF25<br>ATP2B4<br>ACTC1<br>FLNA         | FERMT2<br>SORBS2<br>CRYAB<br>SYNE1            | PDLIM3<br>ILK<br>ACTN1<br>ABCC9             | TPM2<br>DMD<br>SYNPO2<br>PGM5          | TPM1<br>LMOD1<br>FLNC<br>DST                | MYL9<br>DES<br>PALLD<br>NEXN          |                                |
| GO:0005819                    | Spindle                      | 29                | 6.9           | 3.10E-09 | 3.60E-07  | PRC1<br>CDC48<br>KIF15<br>CENPE<br>CKAP2L                                                                                                                                                                                                                                                                                                                                                     | NEK2<br>ASPM<br>TPX2<br>RACGAP1<br>KIF20A (26)       | KNTC1<br>CKAP2<br>NUSAP1<br>TACC3 | TTK<br>CDK1<br>CENPF<br>ECT2                 | AURKA<br>BIRC5<br>CCNB1                                     | AURKB<br>DLGAP5<br>CDC20<br>MAD2L1 | PKD2 KLHL42 MAP7D3 (3)            |                   |                                             |                                               |                                             |                                        |                                             |                                       |                                |
| GO:0030496                    | Midbody                      | 19                | 4.5           | 6.20E-09 | 6.10E-07  | CDK1<br>BIRC5<br>ASPM                                                                                                                                                                                                                                                                                                                                                                         | PRC1<br>AURKB<br>KIF20A (14)                         | NEK2<br>CEP55                     | CENPF<br>RACGAP1                             | CENPE<br>ECT2                                               | AURKA<br>CDC48                     | TACC1 KIF13A CLIC4 SVIL PTCH1 (5) |                   |                                             |                                               |                                             |                                        |                                             |                                       |                                |
| GO:0015630                    | Microtubule cytoskeleton     | 61                | 14.6          | 9.00E-09 | 7.50E-07  | STIL PRC1 KNTC1 RANBP1 NUSAP1 RUVBL1 CKAP2 RACGAP1                                                                                                                                                                                                                                                                                                                                            | KNTC1 TOP2A MCM2 TACC2 NEK2 CHEK1 SHMT2 DLGAP5 CCNB1 | TTK TUBA1C ECT2 CHEK1 RGS19 PLK4  | TPK2 ASPM CDK1 MAD2L1 CEP55 CENPF CCNB2 PCNA | KIF2C KIF11 CKAP2L TUBB NCAPG CENPE BIRC5 CDC20 KIF20A (44) | CDC48 TPX2 STMN1 NCAPG CDC20       | KIF13A CRYAB KLHL42               | MAPT TACC1 MAP1A  | SLMAP CLIC4 MAP1B                           | TUBB6 DST SVIL (17)                           | TUBA1A MAP7D3                               | ROCK2 SORBS1 PKD2                      |                                             |                                       |                                |
| GO:0099513                    | Polymeric cytoskeletal fiber | 45                | 10.8          | 2.40E-08 | 1.70E-06  | PRC1 TPM3 CDK1 CENPE                                                                                                                                                                                                                                                                                                                                                                          | LMNB1 KIF2C KIF11 BIRC5                              | NEK2 TUBB KIF15 RACGAP1           | KNTC1 TUBA1C TPX2 STMN1                      | AURKA ASPM RGS19 KIF26B                                     | AURKB CKAP2 NUSAP1 KIF20A (24)     | FERMT2 TUBB6 ACTN1                | TPM2 LMOD1 PALLD  | TPM1 TUBA1A FLNA                            | TPM1 RSCD1 SVIL                               | KIF13A ACTC1 SVIL                           | DES MAP1A SYNM DST                     | MAPT PKD2 MAP1B TMOD1 (21)                  |                                       |                                |
| GO:0099512                    | Supramolecular fiber         | 45                | 10.8          | 2.40E-08 | 1.70E-06  | PRC1 TPM3 CDK1 CENPE                                                                                                                                                                                                                                                                                                                                                                          | LMNB1 KIF2C KIF11 BIRC5                              | NEK2 TUBB KIF15 RACGAP1           | KNTC1 TUBA1C TPX2 STMN1                      | AURKA ASPM RGS19 KIF26B                                     | AURKB CKAP2 NUSAP1 KIF20A (24)     | FERMT2 TUBB6 MAP1B                | TPM2 LMOD1 ACTN1  | TPM1 TUBA1A PALLD                           | KIF13A RSCD1 FLNA SVIL                        | DES ACTC1 SYNM DST                          | MAPT PKD2 MAP1A TMOD1 (21)             |                                             |                                       |                                |
| GO:0031674                    | I band                       | 18                | 4.3           | 3.10E-08 | 1.80E-06  |                                                                                                                                                                                                                                                                                                                                                                                               |                                                      |                                   |                                              |                                                             |                                    | ACTC1 PALLD ATP2B4                | CRYAB NEXN SORBS2 | FERMT2 FLNC DMD                             | PDLIM3 DST                                    | ACTN1 MYL9 CASQ2 (18)                       | SYNPO2 PGM5 DES                        |                                             |                                       |                                |
| Analysis of Up-regulated DGEs |                              |                   |               |          |           |                                                                                                                                                                                                                                                                                                                                                                                               |                                                      |                                   |                                              |                                                             |                                    |                                   |                   |                                             |                                               |                                             |                                        |                                             |                                       |                                |
| GO:0005654                    | Nucleoplasm                  | 54                | 40.9          | 1.30E-08 | 3.40E-07  | E2F2, PRC1, EZH2, AURKA, CBX2, AURKB, MCM10, CDC48, HIST1H2BK, FANCI, TOP2A, CDC45, CCNA2, CDK1, TPX2, MCM2, UBE2C, MCM5, NCAPD2, RRM2, SNRBP, RUVBL1, KPNA2, UBE2T, CKS1B, HMGB2, BLM, LMNB1, FOXM1, KIAA0101, CHEK1, TYMS, HJURP, BUB1, POLQ, SCO2, FEN1, ETV4, SIM2, TFDP1, RAD51AP1, HIST1H2BD, CENPF, BIRC5, CDC20, RACGAP1, CDC25C, SMC4, CCNB1, CCNB2, ILF2, PARPBP, PCNA, KIF20A (54) |                                                      |                                   |                                              |                                                             |                                    |                                   |                   |                                             |                                               |                                             |                                        |                                             |                                       |                                |
| GO:0005829                    | Cytosol                      | 50                | 37.9          | 3.30E-05 | 5.20E-04  | STIL, PRC1, AP2S1, DTYMK, KNTC1, AURKA, PTTG1, AURKB, KIF2C, CDC48, CDC45, DHCR24, CDK1, KIF11, KIF15, TPX2, UBE2C, ECT2, NCAPD2, MAD2L1, ZWINT, RRM2, SNRBP, STMN1, KPNA2, ARL6IP1, NEK2, SNX8, DIAPH3, CHEK1, TKI, HMMR, TPM3, TYMS, NCAPG, PAFAH1B3, FASN, BUB1, CENPF, BIRC5, CDC20, CENPE, RACGAP1, CDC25C, SMC4, CCNB1, PLK4, CCNB2, BAX, CIT (50)                                      |                                                      |                                   |                                              |                                                             |                                    |                                   |                   |                                             |                                               |                                             |                                        |                                             |                                       |                                |
| GO:0015630                    | Microtubule cytoskeleton     | 44                | 33.3          | 1.90E-18 | 7.40E-16  | STIL, PRC1, NEK2, KNTC1, TTK, CHEK1, AURKA, CEP55, AURKB, KIF2C, CDC48, TUBB, NCAPG, RANBP1, TOP2A, TUBA1C, ASPM, CKAP2, CDK1, SHMT2, KIF11, DLGAP5, KIF15, TPX2, RGS19, CENPF, NUSAP1, CENPE, BIRC5, MCM2, MCM5, SMC4, RACGAP1, TACC3, ECT2, CCNB1, PLK4, CCNB2, MAD2L1, CKAP2L, PCNA, STMN1, RUVBL1, KIF26B, KIF20A (44)                                                                    |                                                      |                                   |                                              |                                                             |                                    |                                   |                   |                                             |                                               |                                             |                                        |                                             |                                       |                                |
| GO:0005694                    | Chromosome                   | 41                | 31.1          | 2.00E-18 | 3.90E-16  | HMGB2, BLM, NEK2, EZH2, KNTC1, TTK, CBX2, CHEK1, AURKA, AURKB, MCM10, KIF2C, CDC48, HIST1H2BK, HJURP, NCAPG, BUB1, HIST3H2A, POLQ, TOP2A, CDC45, FEN1, CDK1, RAD51AP1, HIST1H2BD, MKI67, CENPF, NUSAP1, CENPE, BIRC5, MCM2, MCM5, SMC4, NCAPD2, CCNB1, PLK4, MAD2L1, ZWINT, PARPBP, PCNA, RUVBL1 (41)                                                                                         |                                                      |                                   |                                              |                                                             |                                    |                                   |                   |                                             |                                               |                                             |                                        |                                             |                                       |                                |
| GO:0044427                    | Chromosomal part             | 37                | 28            | 8.70E-17 | 8.70E-15  | HMGB2, BLM, NEK2, EZH2, KNTC1, TTK, CBX2, CHEK1, AURKA, AURKB, MCM10, KIF2C, CDC48, HIST1H2BK, HJURP, NCAPG, BUB1, HIST3H2A, CDC45, FEN1, CDK1, RAD51AP1, 37HIST1H2BD, MKI67, CENPF, CENPE, BIRC5, MCM2, MCM5, SMC4, NCAPD2, CCNB1, MAD2L1, ZWINT, PARPBP, PCNA, RUVBL1 (37)                                                                                                                  |                                                      |                                   |                                              |                                                             |                                    |                                   |                   |                                             |                                               |                                             |                                        |                                             |                                       |                                |
| GO:0005819                    | Spindle                      | 26                | 19.7          | 4.40E-18 | 5.70E-16  | PRC1, NEK2, KNTC1, TTK, AURKA, AURKB, CDC48, ASPM, CKAP2, CDK1, KIF11, DLGAP5, KIF15, TPX2, NUSAP1, CENPF, BIRC5, CDC20, CENPE, RACGAP1, TACC3, ECT2, CCNB1, MAD2L1, CKAP2L, KIF20A (26)                                                                                                                                                                                                      |                                                      |                                   |                                              |                                                             |                                    |                                   |                   |                                             |                                               |                                             |                                        |                                             |                                       |                                |

|                                 |                              |     |      |          |          |                                                                                                                                                                                                                                                                                                                                                                                                                                                                                                                                                                                                                                                                                                                              |
|---------------------------------|------------------------------|-----|------|----------|----------|------------------------------------------------------------------------------------------------------------------------------------------------------------------------------------------------------------------------------------------------------------------------------------------------------------------------------------------------------------------------------------------------------------------------------------------------------------------------------------------------------------------------------------------------------------------------------------------------------------------------------------------------------------------------------------------------------------------------------|
| GO:0098687                      | Chromosomal region           | 25  | 18.9 | 1.20E-15 | 7.90E-14 | CDK1, MKI67, BLM, NEK2, KNTC1, CENPF, TTK, CENPE, BIRC5, CHEK1, AURKA, MCM2, AURKB, MCM5, NCAPD2, CCNB1, KIF2C, CDCA8, MAD2L1, HJURP, ZWINT, PCNA, BUB1, CDCA5, FEN1                                                                                                                                                                                                                                                                                                                                                                                                                                                                                                                                                         |
| GO:0000228                      | Nuclear chromosome           | 24  | 18.2 | 2.20E-10 | 7.20E-09 | CDK1, HMGB2, RAD51AP1, HIST1H2BD, BLM, NEK2, EZH2, BIRC5, CHEK1, AURKA, MCM2, AURKB, MCM10, MCM5, NCAPD2, CCNB1, HIST1H2BK, BUB1, PCNA, HIST3H2A, RUVBL1, CDCA5, TOP2A, FEN1                                                                                                                                                                                                                                                                                                                                                                                                                                                                                                                                                 |
| GO:0099512                      | Supramolecular fiber         | 24  | 18.2 | 2.10E-08 | 4.80E-07 | CKAP2, CDK1, KIF11, LMNB1, PRC1, NEK2, KIF15, TPX2, KNTC1, NUSAP1, RGS19, BIRC5, AURKA, CENPE, AURKB, RACGAP1, TPM3, KIF2C, TUBB, STMN1, ASPM, TUBA1C, KIF26B, KIF20A                                                                                                                                                                                                                                                                                                                                                                                                                                                                                                                                                        |
| GO:0099513                      | Polymeric cytoskeletal fiber | 24  | 18.2 | 2.10E-08 | 4.80E-07 | CKAP2, CDK1, KIF11, LMNB1, PRC1, NEK2, KIF15, TPX2, KNTC1, NUSAP1, RGS19, BIRC5, AURKA, CENPE, AURKB, RACGAP1, TPM3, KIF2C, TUBB, STMN1, ASPM, TUBA1C, KIF26B, KIF20A                                                                                                                                                                                                                                                                                                                                                                                                                                                                                                                                                        |
| GO:0005654                      | Nucleoplasm                  | 54  | 40.9 | 1.30E-08 | 3.40E-07 | E2F2, PRC1, EZH2, AURKA, CBX2, AURKB, MCM10, CDCA8, HIST1H2BK, FANCI, TOP2A, CDCA5, CCNA2, CDK1, TPX2, MCM2, UBE2C, MCM5, NCAPD2, RRM2, SNRPB, RUVBL1, KPNA2, UBE2T, CKS1B, HMGB2, BLM, LMNB1, FOXM1, KIAA0101, CHEK1, TYMS, HJURP, BUB1, POLQ, SCO2, FEN1, ETV4, SIM2, TFDP1, RAD51AP1, HIST1H2BD, CENPF, BIRC5, CDC20, RACGAP1, CDC25C, SMC4, CCNB1, CCNB2, ILF2, PARPBP, PCNA, KIF20A                                                                                                                                                                                                                                                                                                                                     |
| GO:0005829                      | Cytosol                      | 50  | 37.9 | 3.30E-05 | 5.20E-04 | STIL, PRC1, AP2S1, DTYMK, KNTC1, AURKA, PTTG1, AURKB, KIF2C, CDCA8, CDCA5, DHCR24, CDK1, KIF11, KIF15, TPX2, UBE2C, ECT2, NCAPD2, MAD2L1, ZWINT, RRM2, SNRPB, STMN1, KPNA2, ARL6IP1, NEK2, SNX8, DIAPH3, CHEK1, TK1, HMMR, TPM3, TYMS, NCAPG, PAFAH1B3, FASN, BUB1, CENPF, BIRC5, CDC20, CENPE, RACGAP1, CDC25C, SMC4, CCNB1, PLK4, CCNB2, BAX, CIT                                                                                                                                                                                                                                                                                                                                                                          |
| Analysis of Down-regulated DGEs |                              |     |      |          |          |                                                                                                                                                                                                                                                                                                                                                                                                                                                                                                                                                                                                                                                                                                                              |
| GO:0005576                      | Extracellular region         | 104 | 36.4 | 2.60E-04 | 4.10E-03 | SNCA, PTGS1, FGF10, VCL, ACTG2, PTGIS, RAB23, CFD, PI16, SPON1, BST1, SPARCL1, CRYAB, CRTAP, ACTN1, MGP, SERPING1, PRELP, NCAM1, CD34, PLA2G2A, MFAP4, DST, SH3GL2, MAMDC2, ADAMTSL3, PAMR1, P3H2, OSBP1A, FGL2, SBSPO, VSTM4, BHMT2, NTF3, MAOB, AK4, CSRP1, IGIP, EPHA3, LAMA2, C2ORF40, HSPA12A, MYH11, TGFB3, ANTXR2, MYLK, KCTD12, RHOF, FGF9, LEPR, DDR2, DSTN, CKB, DES, GPX3, ANG, GPX3, SERPINA3, RHOB, TUBB6, ITH5, TUBA1A, FGF2, KCNMA1, STX2, CPXM2, PKDCC, WLS, NDNF, FLNA, SLIT3, CLIC4, CNTN1, JAM3, C7, FMOD, C3, CIS, ITM2A, ANXA6, ALDH1A1, IGSF10, GLIPR1, PKD2, ADAMTSL10, DPT, ACTC1, IL6, SVEP1, CREB5, ATP1A2, PTGFR, SOD3, PLAC9, LSP1, PLSCR4, FBLN5, AOX1, HBEGF, GFRA1, GAMT, IGFBP2, PYGB, CDH11 |
| GO:0044421                      | Extracellular region part    | 90  | 31.5 | 3.40E-04 | 5.20E-03 | RHOF, FGF9, SNCA, PTGS1, FGF10, DDR2, DSTN, CKB, VCL, ACTG2, DES, GPC3, PTGIS, ANG, GPX3, SERPINA3, RAB23, RHOB, TUBB6, TUBA1A, CFD, PI16, FGF2, SPON1, KCNMA1, STX2, CRYAB, SPARCL1, BST1, CRTAP, ACTN1, MGP, CPXM2, SERPING1, WLS, FLNA, NDNF, PRELP, SLIT3, NCAM1, CLIC4, CD34, PLA2G2A, CNTN1, MFAP4, DST, SH3GL2, C7, C3, CAMK2G, CIS, ITM2A, C7, FMOD, MAMDC2, C3, ADAMTSL3, C1S, ITM2A, P3H2, ALDH1A1, ANXA6, OSBP1A, PKD2, ADAMTSL10, FGL2, DPT, SBSPO, BHMT2, ACTC1, IL6, MAOB, CREB5, CSRP1, ATP1A2, AK4, SOD3, C2ORF40, LSP1, LAMA2, HSPA12A, PLSCR4, FBLN5, AOX1, MYH11, HBEGF, GFRA1, TGFB3, GAMT, IGFBP2, MYLK, CDH11, PYGB, KCTD12                                                                            |
| GO:0031988                      | Membrane-bound vesicle       | 84  | 29.4 | 5.80E-04 | 7.50E-03 | RHOF, FGF9, SNCA, PTGS1, DDR2, DSTN, VCL, CKB, ACTG2, DES, GPC3, CD93, ANG, GPX3, SERPINA3, RAB23, RHOB, TUBB6, TUBA1A, CFD, PI16, KCNMA1, STX2, CRYAB, SPARCL1, BST1, ACTN1, MGP, SERPING1, PCDH7, WLS, NRXN1, SSPN, FLNA, PRELP, NCAM1, CLIC4, PLA2G2A, CNTN1, MFAP4, DST, SH3GL2, C7, C3, CAMK2G, CIS, ITM2A, ALDH1A1, ANXA6, OSBP1A, PKD2, GALNT15, FGL2, DPT, BHMT2, ACTC1, NTF3, SYTI1, MAOB, CREB5, CSRP1, AK4, SOD3, ITPR1, C2ORF40, LSP1, LAMA2, FBNP1, HSPA12A, PLSCR4, FBLN5, AOX1, MYH11, HBEGF, ABCC4, GFRA1, TGFB3, PTCH1, GAMT, IGFBP2, MYLK, CDH11, PYGB, KCTD12                                                                                                                                             |
| GO:1903561                      | Extracellular vesicle        | 70  | 24.5 | 3.90E-04 | 5.70E-03 | RHOF, FGF9, PTGS1, DDR2, DSTN, VCL, CKB, ACTG2, DES, GPC3, ANG, GPX3, SERPINA3, RAB23, TUBB6, RHOB, TUBA1A, CFD, PI16, KCNMA1, STX2, SPARCL1, BST1, CRYAB, ACTN1, MGP, SERPING1, WLS, FLNA, PRELP, NCAM1, CLIC4, PLA2G2A, CNTN1, MFAP4, DST, SH3GL2, C7, C3, CIS, ITM2A, ALDH1A1, ANXA6, OSBP1A, PKD2, FGL2, DPT, ACTC1, BHMT2, MAOB, CREB5, CSRP1, AK4, ATP1A2, SOD3, LSP1, LAMA2, HSPA12A, PLSCR4, FBLN5, AOX1, MYH11, TGFB3, GFRA1, GAMT, IGFBP2, MYLK, PYGB, KCTD12, CDH11                                                                                                                                                                                                                                               |
| GO:0043230                      | Extracellular organelle      | 70  | 24.5 | 3.90E-04 | 5.60E-03 | RHOF, FGF9, PTGS1, DDR2, DSTN, VCL, CKB, ACTG2, DES, GPC3, ANG, GPX3, SERPINA3, RAB23, TUBB6, RHOB, TUBA1A, CFD, PI16, KCNMA1, STX2, SPARCL1, BST1, CRYAB, ACTN1, MGP, SERPING1, WLS, FLNA, PRELP, NCAM1, CLIC4, PLA2G2A, CNTN1, MFAP4, DST, SH3GL2, C7, C3, CIS, ITM2A, ALDH1A1, ANXA6, OSBP1A, PKD2, FGL2, DPT, ACTC1, BHMT2, MAOB, CREB5, CSRP1, AK4, ATP1A2, SOD3, LSP1, LAMA2, HSPA12A, PLSCR4, FBLN5, AOX1, MYH11, TGFB3, GFRA1, GAMT, IGFBP2, MYLK, PYGB, KCTD12, CDH11                                                                                                                                                                                                                                               |
| GO:0070062                      | Extracellular exosome        | 69  | 24.1 | 5.70E-04 | 7.90E-03 | RHOF, FGF9, PTGS1, DDR2, DSTN, VCL, CKB, ACTG2, DES, GPC3, ANG, GPX3, SERPINA3, RAB23, TUBB6, RHOB, TUBA1A, CFD, PI16, KCNMA1, STX2, SPARCL1, BST1, CRYAB, MGP, ACTN1, SERPING1, WLS, FLNA, PRELP, NCAM1, CLIC4, PLA2G2A, CNTN1, MFAP4, DST, SH3GL2, C7, C3, CIS, ITM2A, ALDH1A1, ANXA6, OSBP1A, PKD2, FGL2, DPT, ACTC1, BHMT2, MAOB, CREB5, CSRP1, AK4, SOD3, LSP1, LAMA2, HSPA12A, PLSCR4, FBLN5, AOX1, MYH11, TGFB3, GFRA1, GAMT, IGFBP2, MYLK, PYGB, KCTD12, CDH11                                                                                                                                                                                                                                                       |
| GO:0030054                      | Cell junction                | 48  | 16.8 | 1.50E-06 | 3.70E-05 | FHL1, CALD1, SNCA, FERMT2, DDR2, VCL, ANXA6, DES, PRRT2, SORBS1, SORBS2, DMD, ILK, PKD2, RHOB, CNN1, UNC5C, LRRFIP1, DTNA, DIXDC1, KCTC1, LPP, SYTI1, MAP1B, ACTN1, SYNPO2, CSRP1, NRXN1, ATP1A2, NEXN, FLNC, PALLD, SSPN, FLNA, TMEM47, TNSI, PGM5, CHRM3, STXBP6, CLIC4, SVIL, ITGA8, AKAP6, SYNM, DST, JAM3, SGCA, KCTD12                                                                                                                                                                                                                                                                                                                                                                                                 |
| GO:0005615                      | Extracellular space          | 36  | 12.6 | 1.50E-02 | 1.10E-01 | FMOD, C3, FGF9, SNCA, FGF10, CIS, CKB, ACTG2, PTGIS, GPC3, ANG, GPX3, SERPINA3, FGL2, CFD, FGF2, DPT, SPON1, IL6, ACTC1, STX2, SPARCL1, CRTAP, CPXM2, ACTN1, SERPING1, SOD3, SLIT3, PRELP, C2ORF40, FBLN5, PLA2G2A, HBEGF, TGFB3, IGFBP2, JAM3 243                                                                                                                                                                                                                                                                                                                                                                                                                                                                           |
| GO:0097458                      | Neuron part                  | 35  | 12.2 | 8.10E-03 | 6.80E-02 | PTGS2, CAMK2G, SNCA, PTGS1, FOS, ATP2B4, FAM107A, ANG, DMD, MAPT, ILK, UNC5C, BOC, DTNA, KCND3, STX2, CRYAB, SYTI1, RBFOX3, MAP1B, WLS, ATP1A2, NRXN1, PALLD, FLNA, ITPR1, LAMA2, EPHA7, CHRM3, ITGA8, SYNM, PTCH1, DST, KCTD12, NFIB                                                                                                                                                                                                                                                                                                                                                                                                                                                                                        |
| GO:0043292                      | Contractile fiber            | 32  | 11.2 | 5.90E-20 | 1.20E-17 | ARHGEF25, CALD1, FERMT2, PDLIM3, TPM2, TPM1, MYL9, VCL, ATP2B4, DES, SORBS2, DMD, ILK, LMOD1, MYOM1, ACTC1, CRYAB, ACTN1, SYNPO2, FLNC, PALLD, NEXN, FLNA, ABCC9, SYNE1, PGM5, SVIL, MYH11, SYNM, DST, CASQ2, TMOD1                                                                                                                                                                                                                                                                                                                                                                                                                                                                                                          |
