# Supplementary material for: Identification of Key Biomarkers in Bladder Cancer: Evidence from a Bioinformatics Analysis
Source: MDPI journal article supplement (doi:10.3390/diagnostics10020066), 2020-01-24

**Figure S1: Quality analysis.** Box plots of GSE datasets before and after normalization. The medians almost present a straight line indicating high data quality.

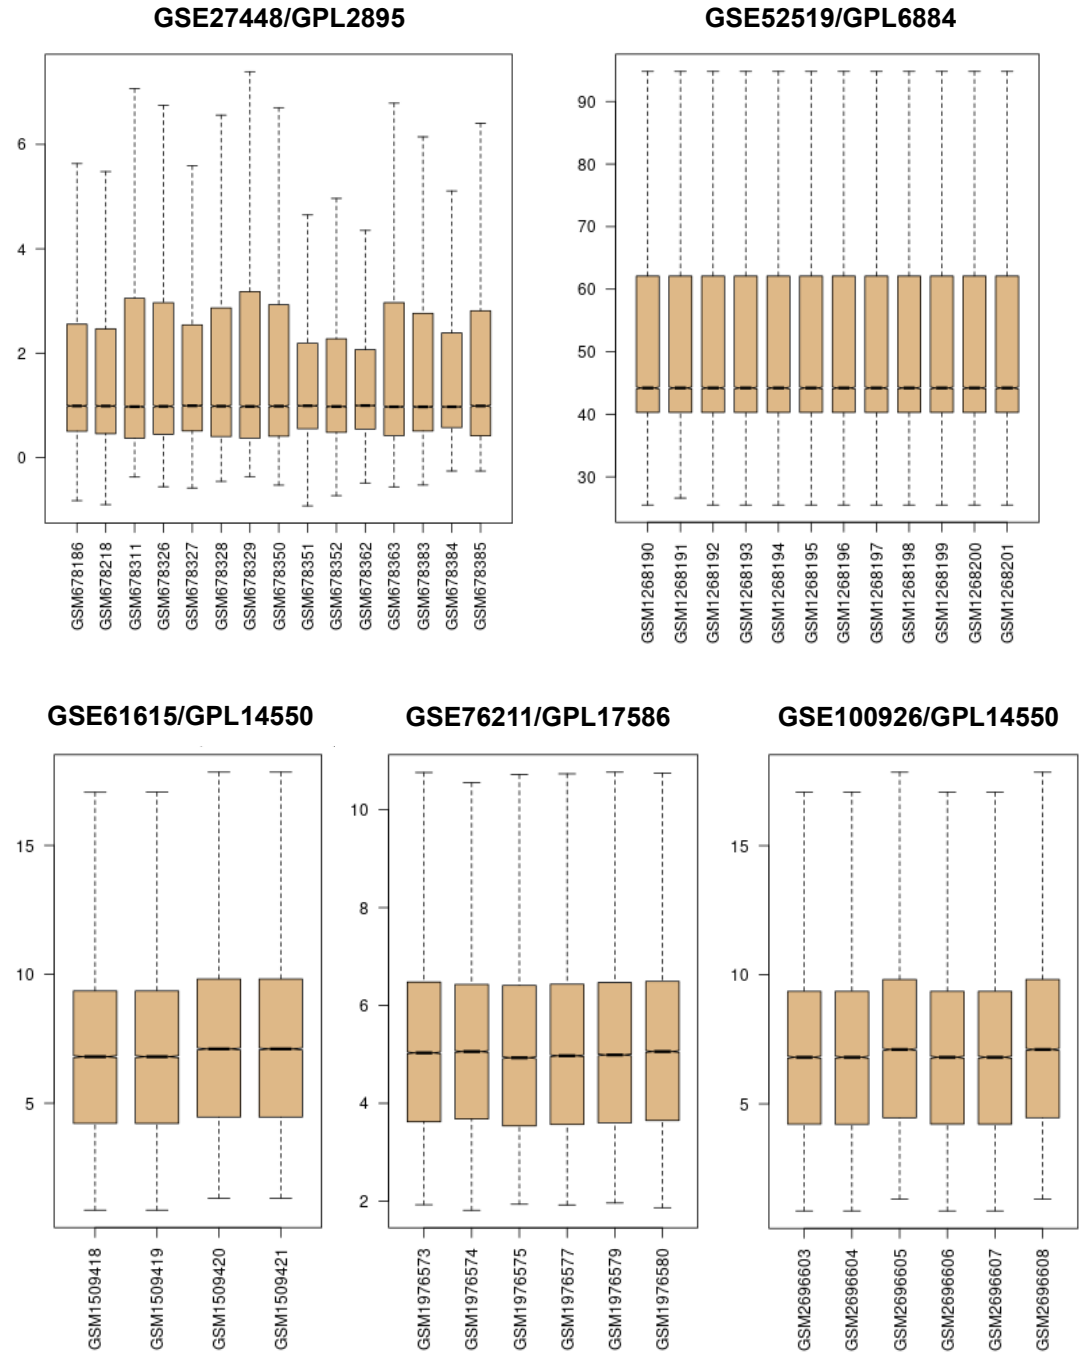

Supplement: s1 [file s1]
