# Supplementary figures and images for: Identification of Key Biomarkers in Bladder Cancer: Evidence from a Bioinformatics Analysis
Source: MDPI journal article supplement (doi:10.3390/diagnostics10020066), 2020-01-24

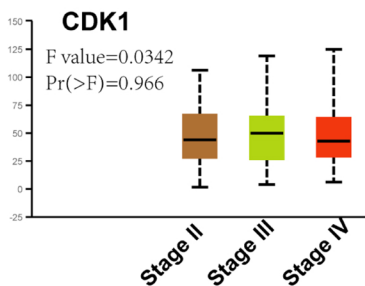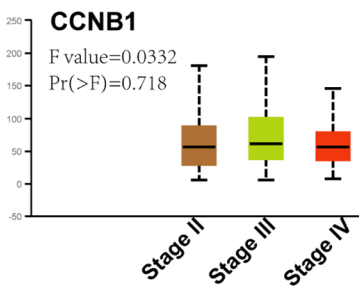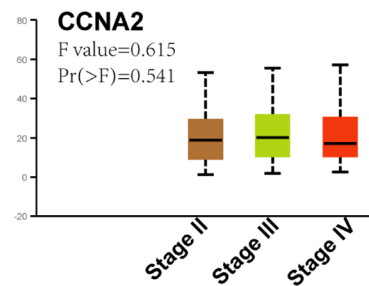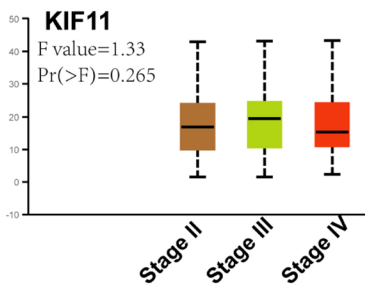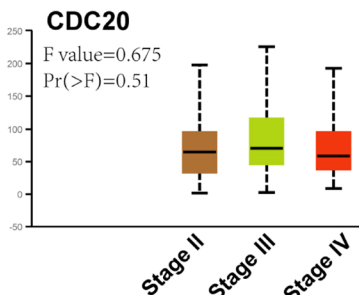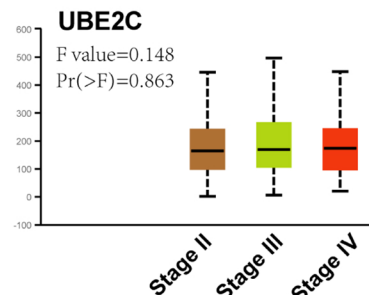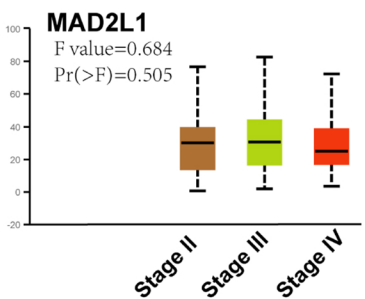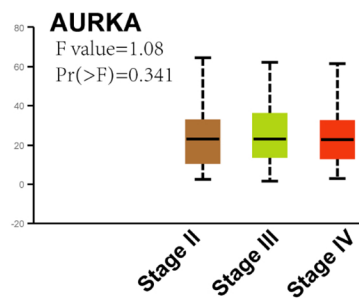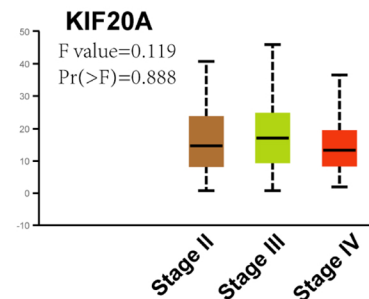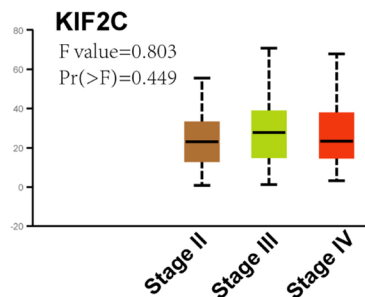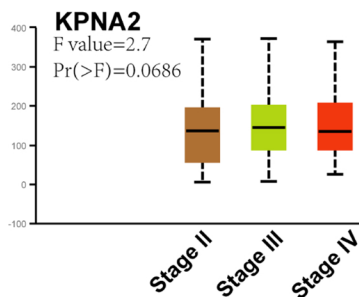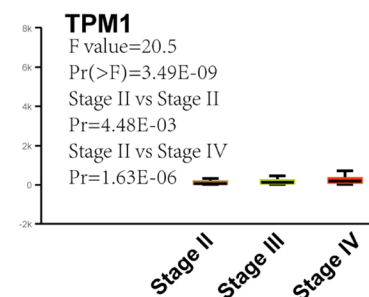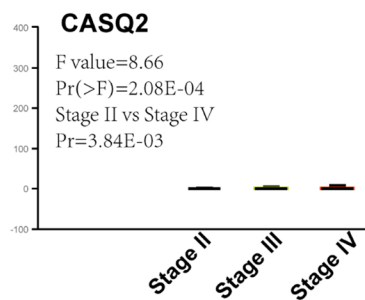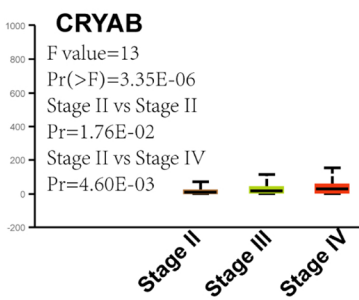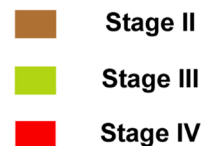

Supplement: s1 [file s1]
